# Supplementary material for: Lanthanide triple-stranded helical complexes with a substituted 2,6-pyridinedicarboxylateElectronic supplementary information (ESI) available: analytical, IR and luminescence data, contact and dipolar shifts, calculated Cartesian co-ordinate for the EuIII complex, plots of chemical shifts for protons H8, H9 versus the chemical shift of proton H2. See http://www.rsc.org/suppdata/dt/b1/b104448f/
Source: Royal Society of Chemistry journal article supplement (doi:10.1039/b104448f), 2001-10-01
Supplement: b104448f.doc [file b104448f.doc]

# Lanthanide triple-stranded helical complexes with a substituted 2,6-pyridinedicarboxylate

# Carlos Platas Iglesias,a, b Claude Piguet,c Nicolas André a and Jean-Claude G. Bünzli a,*

*a* [*Institute of Inorganic and Analytical Chemistry, BCH, University of Lausanne, CH-1015 Lausanne, Switzerland*](mailto:jean-claude.bunzli@icma.unil.ch)

[*b*](mailto:jean-claude.bunzli@icma.unil.ch) *Departamento de Química Fundamental, Universidade da Coruña, Campus de A Zapateira s/n 15071 A Coruña, Spain*

*c Department of Inorganic, Analytical and Applied Chemistry, University of Geneva, 30 quai E. Ansermet, CH-1211 Geneva 4, Switzerland*

**Supporting Information (5 pages)**

**Table S1.** Analyticala andIR data (cm-1) for the Cs3[Ln(L4-2H)3] *n*H2O complexes.

| Cmpd | n | %C | %H | %N | OH | Symm. CO2 stretch | Asymm. CO2 stretch | Ring Breathing |
| --- | --- | --- | --- | --- | --- | --- | --- | --- |
| Gd | 2 | 37.6 (37.7) | 1.9 (2.0) | 6.1 (5.9) | 3369 | 1587 | 1612 | 1516  1438 |
| Eu | 3 | 37.6 (37.4) | 2.2 (2.1) | 5.7 (5.8) | 3395 | 1592 | 1616 | 1516  1438 |
| Yb | 3 | 37.8 (36.9) | 2.0 (2.1) | 5.7 (5.7) | 3390 | 1590 | 1613 | 1516  1438 |

*a* Calculated values within parentheses.

**Table S2.** Contact and dipolar shifts (ppm) for [Ln(L4-2H)3]3- in D2O solution (pD = 7, T = 298 K) computed according to Reilley’s method (eqs 3 and 4).

|  |  | Nd | Eu | Tb | Dy | Ho | Er | Tm | Yb |
| --- | --- | --- | --- | --- | --- | --- | --- | --- | --- |
| H2 | a | -2.43  -1.29  -1.85 | 4.17  2.20  1.76 | -33.46  9.24  -37.84 | -36.86  8.28  -44.00 | -19.28  -3.62  -15.60 | 10.44  -2.46  13.20 | 21.85  -1.31  21.20 | 8.02  -0.41  8.80 |
| H8 | a | -0.44  -0.13  -0.40 | 0.69  0.23  0.38 | -8.03  0.96  -8.26 | -8.65  0.86  -9.60 | -5.88  -2.02  -3.59 | 1.98  -1.37  3.04 | 4.35  -0.73  4.88 | 1.75  -0.23  2.02 |
| H9 | a | -0.20  -0.04  -0.22 | 0.30  0.06  0.21 | -4.60  0.25  -4.47 | -4.91  0.23  -5.20 | -3.56  -1.29  -2.00 | 1.13  -0.88  1.69 | 2.36  -0.47  2.71 | 0.94  -0.15  1.13 |

*a* Experimental values

**Table S3.** Agreement factors *AFi,k* (eq. 8) and *AFj,k* (eq. 9) calculated for H2,8,9 and Ln = Nd, Eu, Tb, Dy, Ho, Er, Tm, Yb in [Ln(L4-2H)3]3- (D2O, pD = 7, 298 K).

| *AFi,k* | H2 | H8 | H9 |
| --- | --- | --- | --- |
| H2 | - | 0.1244 | 0.1749 |
| H8 | 0.0776 | - | 0.0331 |
| H9 | 0.0995 | 0.0286 | - |

| *AFj,k* | H2 | H8 | H9 |
| --- | --- | --- | --- |
| Nd | 0.0193 | 0.1198 | 0.2748 |
| Eu | 0.0043 | 0.1562 | 0.9369 |
| Tb | 0.0137 | 0.0535 | 0.0994 |
| Dy | 0.0133 | 0.0358 | 0.0700 |
| Ho | 0.0538 | 0.3226 | 0.4365 |
| Er | 0.0273 | 0.0935 | 0.0760 |
| Tm | 0.0117 | 0.0891 | 0.1067 |
| Yb | 0.0080 | 0.0024 | 0.0303 |

**Table S4.** Calculated Cartesian atomic co-ordinates for [Eu(L4-2H)3]3- (solution structure, NMR).

| Atom | x | y | z | Atom | x | y | z |
| --- | --- | --- | --- | --- | --- | --- | --- |
| Eu | 0 | 0 | 0 | C | 5.87107 | 3.39667 | 0.02359 |
| Ligand 1 |  |  |  | C | 4.62425 | 2.67931 | 0.01643 |
| H9 | -1.42038 | -12.05067 | 1.67086 | C | 8.37657 | 5.76112 | -0.87065 |
| O | -2.36854 | -2.82203 | 2.61458 | N | 2.22912 | 1.28699 | 0 |
| H(NH2) | -0.5944 | -14.1948 | 0.73618 | H9 | 9.74346 | 7.26559 | -1.5697 |
| H8 | -1.41801 | -9.58662 | 1.65899 | H8 | 7.60728 | 6.03589 | -1.58246 |
| C | -0.79857 | -11.52245 | 0.95895 | C | 3.60066 | 3.04445 | -0.85536 |
| N | -0.00177 | -13.66384 | 0.05861 | C | 2.40594 | 2.31167 | -0.82285 |
| C | -0.79608 | -10.12381 | 0.95197 | H2 | 3.72528 | 3.87434 | -1.54002 |
| H2 | -1.46454 | -5.14779 | 1.57939 | O | 0.22892 | 1.8579 | -1.5947 |
| C | -1.60745 | -2.36881 | 1.74783 | C | 1.24138 | 2.62345 | -1.72393 |
| O | -1.41494 | -1.1362 | 1.63353 | O | 1.25955 | 3.53924 | -2.55897 |
| C | -0.00062 | -12.23386 | 0.051 | Ligand 3 |  |  |  |
| H(NH2) | 0.5883 | -14.20307 | -0.61385 | H9 | -9.726 | 7.25542 | 1.67086 |
| C | -0.81538 | -4.62809 | 0.88495 | O | -1.25968 | 3.46223 | 2.61458 |
| C | -0.78698 | -3.25102 | 0.85462 | H(NH2) | -11.99586 | 7.61217 | 0.73618 |
| C | 0.00334 | -9.42718 | 0.03767 | H8 | -7.59325 | 6.02134 | 1.65899 |
| C | 0.00548 | -7.98855 | 0.02952 | C | -9.57945 | 6.45281 | 0.95895 |
| C | 0.79912 | -11.53428 | -0.86381 | N | -11.83235 | 6.83345 | 0.05861 |
| C | 0.00607 | -6.78283 | 0.02359 | C | -8.36944 | 5.75133 | 0.95197 |
| C | 0.00823 | -5.34437 | 0.01643 | H2 | -3.72585 | 3.84222 | 1.57939 |
| C | 0.80099 | -10.13488 | -0.87065 | C | -1.24772 | 2.5765 | 1.74783 |
| N | 0 | -2.57397 | 0 | O | -0.27651 | 1.79347 | 1.63353 |
| H9 | 1.42045 | -12.07088 | -1.5697 | C | -10.59452 | 6.11747 | 0.051 |
| H8 | 1.42359 | -9.60604 | -1.58246 | H(NH2) | -12.59437 | 6.59205 | -0.61385 |
| C | 0.83624 | -4.64049 | -0.85536 | C | -3.60035 | 3.02018 | 0.88495 |
| C | 0.79899 | -3.23944 | -0.82285 | C | -2.42198 | 2.30705 | 0.85462 |
| H2 | 1.49264 | -5.16336 | -1.54002 | C | -8.16585 | 4.7107 | 0.03767 |
| O | 1.49453 | -1.1272 | -1.5947 | C | -6.92103 | 3.98953 | 0.02952 |
| C | 1.65129 | -2.38679 | -1.72393 | C | -10.38854 | 5.07508 | -0.86381 |
| O | 2.4353 | -2.86042 | -2.55897 | C | -5.87714 | 3.38616 | 0.02359 |
| Ligand 2 |  |  |  | C | -4.63248 | 2.66506 | 0.01643 |
| H9 | 11.14638 | 4.79525 | 1.67086 | C | -9.17756 | 4.37376 | -0.87065 |
| O | 3.62822 | -0.6402 | 2.61458 | N | -2.22913 | 1.28698 | 0 |
| H(NH2) | 12.59026 | 6.58263 | 0.73618 | H9 | -11.16391 | 4.80529 | -1.5697 |
| H8 | 9.01126 | 3.56528 | 1.65899 | H8 | -9.03087 | 3.57015 | -1.58246 |
| C | 10.37802 | 5.06964 | 0.95895 | C | -4.4369 | 1.59604 | -0.85536 |
| N | 11.83412 | 6.83039 | 0.05861 | C | -3.20493 | 0.92777 | -0.82285 |
| C | 9.16552 | 4.37248 | 0.95197 | H2 | -5.21792 | 1.28902 | -1.54002 |
| H2 | 5.19039 | 1.30557 | 1.57939 | O | -1.72345 | -0.7307 | -1.5947 |
| C | 2.85517 | -0.20769 | 1.74783 | C | -2.89267 | -0.23666 | -1.72393 |
| O | 1.69145 | -0.65727 | 1.63353 | O | -3.69485 | -0.67882 | -2.55897 |
| C | 10.59514 | 6.11639 | 0.051 | C | 6.91555 | 3.99902 | 0.02952 |
| H(NH2) | 12.00607 | 7.61102 | -0.61385 | C | 9.58942 | 6.4592 | -0.86381 |
| C | 4.41573 | 1.60791 | 0.88495 | C | 5.87107 | 3.39667 | 0.02359 |
| C | 3.20896 | 0.94397 | 0.85462 | C | 4.62425 | 2.67931 | 0.01643 |
| C | 8.16251 | 4.71648 | 0.03767 | C | 8.37657 | 5.76112 | -0.87065 |
| C | 6.91555 | 3.99902 | 0.02952 | C | 5.87107 | 3.39667 | 0.02359 |
| C | 9.58942 | 6.4592 | -0.86381 | C | 4.62425 | 2.67931 | 0.01643 |
|  |  |  |  | C | 8.37657 | 5.76112 | -0.87065 |

**Table S5.** Identified Eu(7F*J*) crystal field levels (cm-1, *J* = 1 – 4) in [Ln(L4-2H)3]3- from luminescence spectra.

|  | *T* / K | 7F1 | 7F2 | 7F3 | 7F4 |
| --- | --- | --- | --- | --- | --- |
| Solid state | 10 | 342  393  424 | 887  984  1003  1089  1128 |  | 2672  2718  2856  3035 |
| MeOH | 295 | 307  407 | 985  1098 | 1829  1883 | 2699  2840  3020 |

**Figure S1.**  Plots of (**H*n*)*j*/<*S*z>*j* (*n* = 8,9) versus (**H2)*j*/<*S*z>*j* .
